# Supplementary material
Source: publisher site journal article supplement (https://www.spandidos-publications.com/6284/downloadSupplementary)
Supplement: Supplementary file 1 [file downloadSupplementary]

## Sheet: Sheet1
Table SIX. Multivariate analysis of factors associated with overall survival time.
	Multivariate analysis
	p-value	Hazard Ratio	95% confidence intervel
AFP	0.057	2.699	0.972-7.494
Pathologic differentiation	0.867	0.912	0.314-2.655
Number of lesions	0.412	1.884	0.415-8.551
Tumor sizes	0.677	0.718	0.152-3.405
Completion of capsula	0.102	3.662	0.774-17.326
Positive margin	0.955	0.966	0.284-3.28
TNM stage	0.169	3.742	0.57-24.549
PVTT	0.218	2.062	0.652-6.521
Lymph node metastasis	0.003	12.49	2.42-64.476
RPL9 Elisa results	0.253	1.776	0.663-4.756
Hazard ratio and P values were calculated using multivariate Cox proportional hazards regression.
